# Supplementary material for: Nonlinear Fitness Landscape of a Molecular Pathway
Source: PubMed Central journal article supplement (PMC3140986; doi:10.1371/journal.pgen.1002160), 2011-07-21
Supplement: pgen.1002160.s013.pdf [file pgen.1002160.s013.pdf]

| Strain  | Genotype                                                                | Construction/Reference                |
|---------|-------------------------------------------------------------------------|---------------------------------------|
| BW30270 | K12 MG1655 <i>rph</i> <sup>+</sup>                                      | <i>E. coli</i> genetic stock center   |
| S4078   | BW30270 $\Delta lacIZYA::pKD3$ -cm                                      | BW30270/pKD46 x pKD3 PCR S911/S937    |
| S4085   | BW30270 $\Delta lacIZYA::FRT$                                           | S4078 x pCP20 flp                     |
| T386    | BW30270 $\Delta lacY::pKD4$ -Kan                                        | BW30270/pKD46 x pKD4 PCR T280/T281    |
| T407    | BW30270 $\Delta lacY::FRT$                                              | T386 x pCP20 flp                      |
| T521    | BW30270 $\Delta lacI::pKD4$ -Kan                                        | BW30270/pKD46 x pKD4 PCR T361/T362    |
| T523    | BW30270 $\Delta lacI::FRT$                                              | T521 x pCP20 flp                      |
| S3974   | BW30270 <i>ilvG</i> <sup>+</sup>                                        | [1]                                   |
| S4197   | BW30270 <i>ilvG</i> <sup>+</sup> $\Delta lacZ$                          | S3974 $\Delta lacZ$ -pFDY217          |
| T765    | BW30270 <i>ilvG</i> <sup>+</sup> $\Delta lacI::pKD4$ -Kan $\Delta lacZ$ | S4197/pKD46 x pKD4 PCR (T361/T362)    |
| T792    | BW30270 $\Delta lacI::pKD4$ -Kan $\Delta lacZ$                          | T765 x T4GT7(T765)                    |
| T807    | BW30270 $\Delta lacI \Delta lacZ$                                       | T792 x pCP20 flp                      |
| S4146   | BW30270 $\Delta lacPO::pKD3$ -cm                                        | BW30270/pKD46 x pKD3 PCR T125/T126    |
| T45     | BW30270                                                                 | S4146/pKD46 x pKELP01 PCR (T123/T124) |
| T109    | BW30270 <i>lacO1</i> -20R                                               | S4146/pKD46 x pKELP04 PCR (T123/T124) |
| T46     | BW30270 <i>lacO1</i> -20GCW                                             | S4146/pKD46 x pKELP05 PCR (T123/T124) |
| T47     | BW30270 <i>lacO1</i> -20GCI                                             | S4146/pKD46 x pKELP06 PCR (T123/T124) |
| T48     | BW30270 <i>lacO1</i> -SN2                                               | S4146/pKD46 x pKELP07 PCR (T123/T124) |
| T49     | BW30270 <i>lacO1</i> -SN3                                               | S4146/pKD46 x pKELP08 PCR (T123/T124) |
| T50     | BW30270 <i>lacO1</i> -SN4                                               | S4146/pKD46 x pKELP09 PCR (T123/T124) |
| T110    | BW30270 <i>lacO1</i> -SN5                                               | S4146/pKD46 x pKELP10 PCR (T123/T124) |
| T111    | BW30270 <i>lacO1</i> -SN7                                               | S4146/pKD46 x pKELP12 PCR (T123/T124) |
| T112    | BW30270 <i>lacO1</i> -SN8                                               | S4146/pKD46 x pKELP13 PCR (T123/T124) |
| T265    | BW30270 <i>lacO1</i> -SN9                                               | S4146/pKD46 x pKELP14 PCR (T123/T124) |
| T267    | BW30270 <i>lacO1</i> -SN12                                              | S4146/pKD46 x pKELP17 PCR (T123/T124) |
| T268    | BW30270 <i>lacO1</i> -SN19                                              | S4146/pKD46 x pKELP16 PCR (T123/T124) |
| T218    | BW30270 $\Delta lacPO::pKD3$ -cm                                        | BW30270 x T4GT7(S4146)                |
| T273    | BW30270                                                                 | T218 x T4GT7(T108)                    |
| T274    | BW30270 <i>lacO1</i> -20R                                               | T218 x T4GT7(T109)                    |
| T275    | BW30270 <i>lacO1</i> -20GCW                                             | T218 x T4GT7(T46)                     |
| T318    | BW30270 <i>lacO1</i> -20GCI                                             | T218 x T4GT7(T47)                     |
| T319    | BW30270 <i>lacO1</i> -SN2                                               | T218 x T4GT7(T48)                     |
| T320    | BW30270 <i>lacO1</i> -SN3                                               | T218 x T4GT7(T49)                     |
| T321    | BW30270 <i>lacO1</i> -SN4                                               | T218 x T4GT7(T50)                     |
| T322    | BW30270 <i>lacO1</i> -SN5                                               | T218 x T4GT7(T110)                    |
| T522    | BW30270 <i>lacO1</i> -SN7                                               | T218 x T4GT7(T111)                    |
| T323    | BW30270 <i>lacO1</i> -SN8                                               | T218 x T4GT7(T112)                    |
| T377    | BW30270 <i>lacO1</i> -SN9                                               | T218 x T4GT7(T265)                    |
| T378    | BW30270 <i>lacO1</i> -SN12                                              | T218 x T4GT7(T267)                    |
| T379    | BW30270 <i>lacO1</i> -SN19                                              | T218 x T4GT7(T268)                    |

[1] G Raja Venkatesh, Frant Carlot Kembou Koungni, Andreas Paukner, Thomas Stratmann, Birgit Blissenbach, and Karin Schnetz, "BglJ-RcsB heterodimers relieve repression of the *Escherichia coli* *bgl* operon by H-NS," *J. Bacteriol.*, JB.00807–10 (2010).
