# Supplementary material for: Nonlinear Fitness Landscape of a Molecular Pathway
Source: PubMed Central journal article supplement (PMC3140986; doi:10.1371/journal.pgen.1002160), 2011-07-21
Supplement: pgen.1002160.s014.pdf [file pgen.1002160.s014.pdf]

| Plasmid | Structure                                                                                             | Construction or reference                              |
|---------|-------------------------------------------------------------------------------------------------------|--------------------------------------------------------|
| pKD3    | FRT-flanked cat gene in <i>oriR<math>\gamma</math></i> replicon requiring the <i>pir</i> gene product | [1]                                                    |
| pKD4    | FRT-flanked kan gene in <i>oriR<math>\gamma</math></i> replicon requiring the <i>pir</i> gene product | [1]                                                    |
| pCP20   | flp-recombinase repts catR ampR                                                                       | [1]                                                    |
| pKEM72  | pUV5-proV(+1 to+303)-rrnBT1 in pUC12 ampR                                                             | laboratory collection                                  |
| pKELP01 | wild type <i>lac</i> promoter (-90 to +163) - rrnBT1 in pUC12, ampR                                   | MG1655 PCR T121/T122 in pKEM72 XbaI Sall               |
| pKELP04 | <i>lac</i> promoter <i>lac</i> O1-20R(-90 to +163) - rrnBT1 in pUC12, AmpR                            | pKELP01 PCR T131/S133 and T132/T24 in pKEM72 XbaI Sall |
| pKELP05 | <i>lac</i> promoter <i>lac</i> O1-GCW(-90 to +163) - rrnBT1 in pUC12, AmpR                            | pKELP01 PCR T133/S133 and T134/T24 in pKEM72 XbaI Sall |
| pKELP06 | <i>lac</i> promoter <i>lac</i> O1-GCI(-90 to +163) - rrnBT1 in pUC12, AmpR                            | pKELP01 PCR T135/S133 and T136/T24 in pKEM72 XbaI Sall |
| pKELP07 | <i>lac</i> promoter <i>lac</i> O1-SN2(-90 to +163) - rrnBT1 in pUC12, AmpR                            | pKELP01 PCR T150/S133 and T151/T24 in pKEM72 XbaI Sall |
| pKELP08 | <i>lac</i> promoter <i>lac</i> O1-SN3(-90 to +163) - rrnBT1 in pUC12, AmpR                            | pKELP01 PCR T152/S133 and T153/T24 in pKEM72 XbaI Sall |
| pKELP09 | <i>lac</i> promoter <i>lac</i> O1-SN4(-90 to +163) - rrnBT1 in pUC12, AmpR                            | pKELP01 PCR T154/S133 and T155/T24 in pKEM72 XbaI Sall |
| pKELP10 | <i>lac</i> promoter <i>lac</i> O1-SN5(-90 to +163) - rrnBT1 in pUC12, AmpR                            | pKELP01 PCR T156/S133 and T157/T24 in pKEM72 XbaI Sall |
| pKELP12 | <i>lac</i> promoter <i>lac</i> O1-SN7(-90 to +163) - rrnBT1 in pUC12, AmpR                            | pKELP01 PCR T160/S133 and T161/T24 in pKEM72 XbaI Sall |
| pKELP13 | <i>lac</i> promoter <i>lac</i> O1-SN8(-90 to +163) - rrnBT1 in pUC12, AmpR                            | pKELP01 PCR T162/S133 and T163/T24 in pKEM72 XbaI Sall |
| pKELP14 | <i>lac</i> promoter <i>lac</i> O1-SN9(-90 to +163) - rrnBT1 in pUC12, AmpR                            | pKELP01 PCR T164/S133 and T165/T24 in pKEM72 XbaI Sall |
| pKELP16 | <i>lac</i> promoter <i>lac</i> O1-SN19(-90 to +163) - rrnBT1 in pUC12, AmpR                           | pKELP01 PCR T184/S133 and T185/T24 in pKEM72 XbaI Sall |
| pKELP17 | <i>lac</i> promoter <i>lac</i> O1-SN12(-90 to +163) - rrnBT1 in pUC12, AmpR                           | pKELP01 PCR T170/S133 and T171/T24 in pKEM72 XbaI Sall |
| pFDY217 | <i>lacI lacOP</i> [ $\Delta$ <i>lacZ</i> ] <i>lacY lacA</i> pSC101-repTS tetR                         | [2]                                                    |

- [1] K A Datsenko and B L Wanner, "One-step inactivation of chromosomal genes in *Escherichia coli* K-12 using PCR products," *Proc Natl Acad Sci U S A* **97**, 6640–6645 (2000).
- [2] Sudhanshu Dole, Sandra Kühn, and Karin Schnetz, "Post-transcriptional enhancement of *Escherichia coli* *bgl* operon silencing by limitation of BglG-mediated antitermination at low transcription rates," *Mol Microbiol* **43**, 217–226 (2002).
